# Supplementary material
Source: PubMed Central journal article supplement (PMC9664246)
Supplement: NIHMS1744000-supplement-Supplementary_Material.pdf [file NIHMS1744000-supplement-Supplementary_Material.pdf]

**Appendix**  
**Reducing Recreational Sedentary Screen Time: A Community Guide Systematic Review**  
**Ramsey Buchanan et al.**

**Appendix Table 1.** Studies and Study Arms Stratified by Intervention Type and Intensity

| Screen-time-only studies |                                                           |                                    |                                                                                                                                                                                              | Screen-time-plus studies                                                                                                                                                                                                                                                                                                                                                                                                                                                                 |                                  |                                                                                                                                                                                             |
|--------------------------|-----------------------------------------------------------|------------------------------------|----------------------------------------------------------------------------------------------------------------------------------------------------------------------------------------------|------------------------------------------------------------------------------------------------------------------------------------------------------------------------------------------------------------------------------------------------------------------------------------------------------------------------------------------------------------------------------------------------------------------------------------------------------------------------------------------|----------------------------------|---------------------------------------------------------------------------------------------------------------------------------------------------------------------------------------------|
|                          | High intensity studies/Study arms                         | Low intensity studies/Study arms   | High and low intensity studies/Study arms                                                                                                                                                    | High intensity studies/Study arms                                                                                                                                                                                                                                                                                                                                                                                                                                                        | Low intensity studies/Study arms | High and low intensity studies/Study arms                                                                                                                                                   |
| Study design             | Author, year                                              | Author, year                       | Author, year                                                                                                                                                                                 | Author, year                                                                                                                                                                                                                                                                                                                                                                                                                                                                             | Author, year                     | Author, year                                                                                                                                                                                |
| RCT                      | Epstein 2008<br>Otten 2009<br>Todd 2008<br>Zimmerman 2012 | Birken 2012<br>Escobar-Chavez 2010 | Ford 2002 (treated as 2 pre-post study arms without comparison; 1 high/1 low intensity)<br><br>Ni Mhurchu 2009 (treated as 2 pre-post study arms without comparison; 1 high/1 low intensity) | Epstein 1995 (treated as 2 pre-post study arms without comparison; both high intensity)<br>Epstein 2000 (treated as 4 pre-post study arms without comparison; all high intensity)<br>French 2011<br>Goldfield 2006<br>Jago 2013<br>Patrick 2006<br>Robinson 2003<br>Robinson 2010<br>Roemmich 2004<br>Roemmich 2012 (treated as 3 pre-post study arms without comparison; all high intensity),<br>Spring 2012 (treated as 2 pre-post study arms without comparison; both high intensity) | O'Connor 2011                    | Shapiro 2008 (treated as 3 pre-post study arms without comparison; 2 high/1 low intensity),<br><br>Warren 2003 (treated as 2 pre-post study arms with a comparison; 1 high/1 low intensity) |

**Appendix**  
**Reducing Recreational Sedentary Screen Time: A Community Guide Systematic Review**  
**Ramsey Buchanan et al.**

| Screen-time-only studies     |                                 | Screen-time-plus studies                                                                                                                                                                                                                                                                       |                                                                                                                                                                                                        |
|------------------------------|---------------------------------|------------------------------------------------------------------------------------------------------------------------------------------------------------------------------------------------------------------------------------------------------------------------------------------------|--------------------------------------------------------------------------------------------------------------------------------------------------------------------------------------------------------|
| Group RCT                    | Robinson 1999,<br>Robinson 2006 | Dennison 2004<br>Gortmaker 1999 (Planet Health)<br>Marcus 2009<br>Puder 2011<br>Salmon 2008 (treated as 2 pre-post study arms with a comparison; both high intensity)<br>Salmon 2011<br>Tavares 2011<br>Tucker 2011 (treated as 2 pre-post study arms without comparison; both high intensity) | Branscum 2011 (treated as 2 pre-post study arms without comparison; both low intensity)<br>Campbell 2013<br>Ezendam 2012<br>Gentile 2009<br>Hardy 2010<br>Jouret 09<br>Lloyd 2012<br>Spruijt-Metz 2008 |
| Before-After with Comparison |                                 | Gortmaker 1999 (Eat Well, Keep Moving)<br>de Silva-Sanigorski 2010<br>Harrison 2006<br>de Silva-Sanigorski/Johnson 2012                                                                                                                                                                        |                                                                                                                                                                                                        |
| Non-randomized Trial         |                                 |                                                                                                                                                                                                                                                                                                | Whaley 2010                                                                                                                                                                                            |
| Single Group Before-After    | Gorin 2006      Johnson 2005    | Davison 2013                                                                                                                                                                                                                                                                                   | Riggs 2007                                                                                                                                                                                             |
| Total                        | 12 studies, 14 study arms       | 37 studies, 50 study arms                                                                                                                                                                                                                                                                      |                                                                                                                                                                                                        |

Appendix Figure 1. Study limitations.

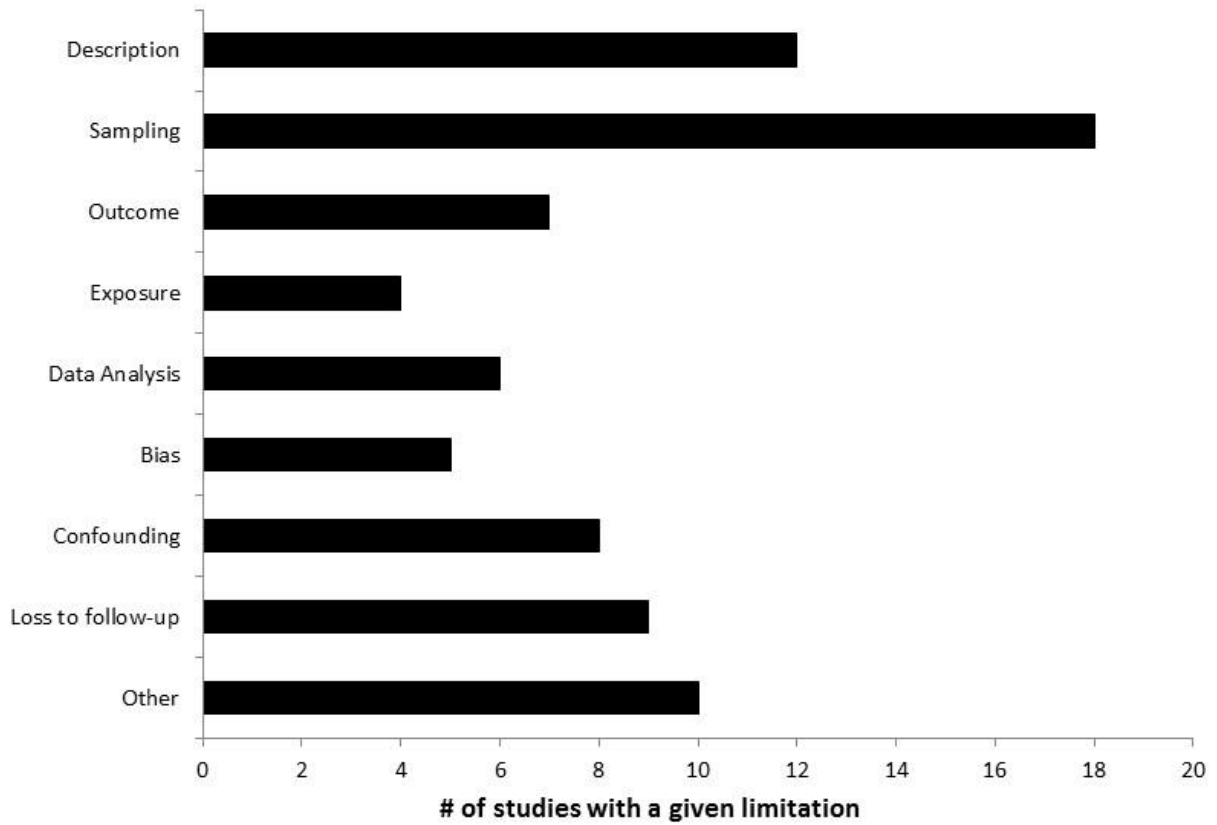

**Appendix**  
**Reducing Recreational Sedentary Screen Time: A Community Guide Systematic Review**  
 Ramsey Buchanan et al.

**Appendix Figure 2.** Change in composite screen time among children aged 13 years and younger, Community Guide screen time review.

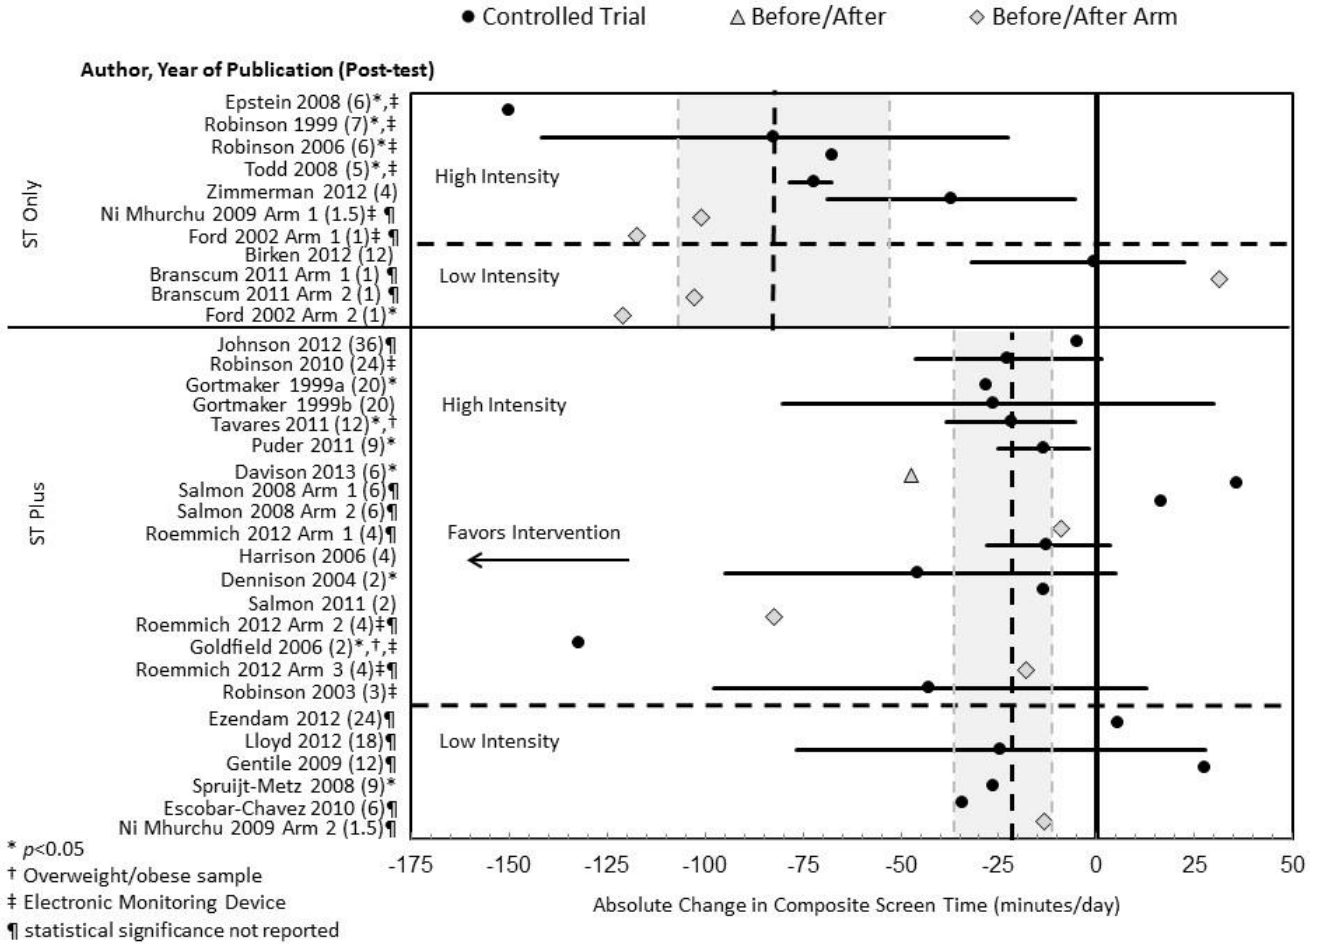

**Appendix**  
**Reducing Recreational Sedentary Screen Time: A Community Guide Systematic Review**  
 Ramsey Buchanan et al.

**Appendix Figure 3.** Change in obesity prevalence among children aged 13 years and younger, Community Guide screen time review.

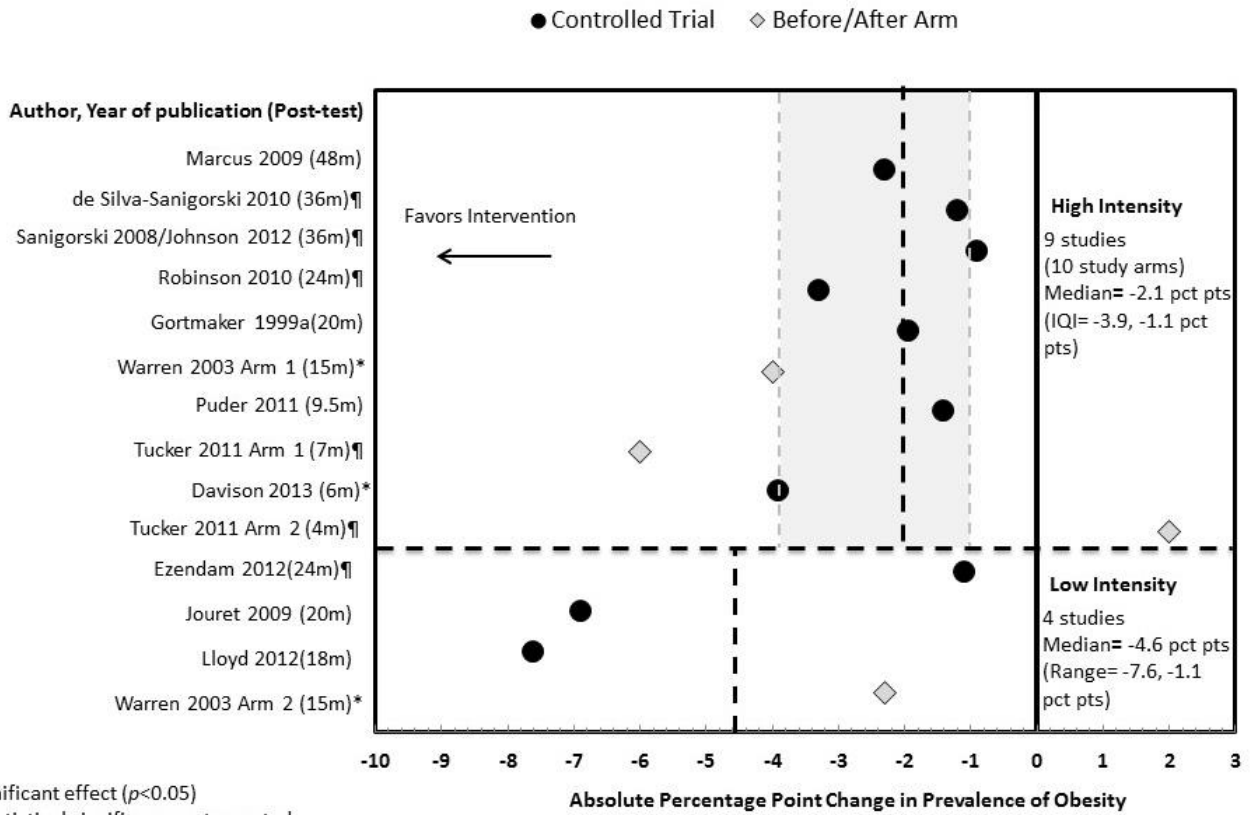

\*Significant effect ( $p < 0.05$ )

¶ statistical significance not reported

IQI, Interquartile Interval; pct pts, percentage points

Note: some studies combined overweight and obesity prevalence. In this case, it was not possible to separate out obesity, and a combined prevalence is reported.

## **Physical Activity and Dietary Behavior Outcomes**

**Physical activity.** Forty-seven study arms from 35 studies<sup>36,38,41,42,44,46-49,52,54-63,65,66,68,69,71-80,83</sup> reported physical activity. Sixteen study arms from 14 studies reported a median increase in moderate to vigorous physical activity (MVPA) of 2.3 minutes/day (IQR= -4.5, 16.7) (Table 2, below). Accelerometer counts were used to measure physical activity in seven study arms and in seven high-intensity study arms. Four study arms from two studies found a median increase of 66.0 counts/day (range=40.8, 115),<sup>74,75</sup> three study arms from three studies where TV viewing was contingent on physical activity found a median increase of 130.0 counts/day (range=127.8, 150.0).<sup>57,73,74</sup> The body of evidence for both interventions was generally positive, though the magnitude of effect was often small. Among adults, four study arms from three studies<sup>55,62,83</sup> reported a median increase of 14.3 minutes/day in duration of MVPA (range=10.8, 29.6).

**Dietary behaviors.** Forty study arms from 32 studies included dietary behaviors as outcomes among children<sup>35-38,40-42,44,47-50,54-59,63,65,66,68,70-72,77,79-82</sup> and adults.<sup>46,83</sup> Eleven screen-time-only study arms from nine studies<sup>35-38,40-42,44,46</sup> reported dietary outcomes, even though improving diet was not specifically targeted in the interventions (Table 2, below). Twenty-nine screen-time-plus study arms from 23 studies<sup>47-50,54-59,63,65,66,68,70-72,77,79-83</sup> reported dietary outcomes. Six study arms<sup>36,49,57,59,71,72</sup> reported a median reduction in total energy intake (kilocalories/day) of 121.0 (IQR= -268.0, 0.59). Three study arms from 2 studies<sup>41,57</sup> reported a median decrease in snack intake (measured in kilocalories/day) of 233.7 (range= -281.9, -123.7). For the remaining outcomes, the body of evidence for both interventions was generally positive, though the magnitude of effect was often small. Among adults, one study<sup>55</sup> reported a significant decrease in eating meals with the TV on, snack intake, and sugar-sweetened beverage intake.

**Appendix**  
**Reducing Recreational Sedentary Screen Time: A Community Guide Systematic Review**  
**Ramsey Buchanan et al.**

**Table 2.** Selected Outcomes for Children Stratified by Intervention Type and Intensity

| Outcome                                   | Screen-time-only <sup>a</sup> |                            |                                                    | Screen-time-plus <sup>b</sup> |                                                                                                |                                                    | Combined Screen-time-only and screen-time-plus                                                 |                         |
|-------------------------------------------|-------------------------------|----------------------------|----------------------------------------------------|-------------------------------|------------------------------------------------------------------------------------------------|----------------------------------------------------|------------------------------------------------------------------------------------------------|-------------------------|
|                                           | High intensity <sup>c</sup>   | Low intensity <sup>d</sup> | Screen-time-only (high and low intensity combined) | High intensity                | Low intensity                                                                                  | Screen-time-plus (high and low intensity combined) |                                                                                                |                         |
| <b>Recreational sedentary screen time</b> |                               |                            |                                                    |                               |                                                                                                |                                                    |                                                                                                |                         |
| Commercial TV viewing (minutes/day)       | No. of study arms             | 6                          | 3                                                  | 9                             | 13                                                                                             | 5                                                  | 18                                                                                             | 27                      |
|                                           | Median change                 | -46.8<br>(-210.0, -34.8)   | -0.6<br>(-120.6, 0.0)                              | -45.6<br>(-162.6, -15.0)      | -13.8<br>(-52.2, 6.0)                                                                          | -18.0<br>(-78.0, 0.0)                              | -16.2<br>(-70.8, 3.6)                                                                          | -22.2<br>(-76.8, -0.60) |
| Composite screen time (minutes/day)       | No. of study arms             | 7                          | 4                                                  | 11                            | 17                                                                                             | 6                                                  | 23                                                                                             | 34                      |
|                                           | Median change                 | -82.2<br>(-117.6, -67.2)   | -51.6<br>(-116.4, -23.4)                           | -82.2<br>(-117.6, -37.2)      | -21.6<br>(-44.4, -10.8)                                                                        | -19.2<br>(-28.2, 10.8)                             | -21.6<br>(-34.2, -9.0)                                                                         | -26.4<br>(-74.4, -12.0) |
| <b>Physical activity</b>                  |                               |                            |                                                    |                               |                                                                                                |                                                    |                                                                                                |                         |
| Accelerometer counts (counts/day)         | No. of study arms             | NR                         | NR                                                 | NR                            | 7                                                                                              | NR                                                 | 7                                                                                              | NA                      |
|                                           | Median change                 |                            |                                                    |                               | 4 arms:<br>66.0 (40.8, 115.0)<br><br>Contingent <sup>e</sup><br>(3 arms): 130.0 (127.8, 150.0) |                                                    | 4 arms:<br>66.0 (40.8, 115.0)<br><br>Contingent <sup>e</sup><br>(3 arms): 130.0 (127.8, 150.0) |                         |

**Appendix**  
**Reducing Recreational Sedentary Screen Time: A Community Guide Systematic Review**  
**Ramsey Buchanan et al.**

|                                                                  |                   |                       |        |                       |                              |                           |                            |                          |
|------------------------------------------------------------------|-------------------|-----------------------|--------|-----------------------|------------------------------|---------------------------|----------------------------|--------------------------|
| Pedometer steps (steps/day)                                      | No. of study arms | 2                     | 1      | 3                     | 4                            | 2                         | 6                          | 9                        |
|                                                                  | Median change     | 679.0<br>(298, 1,150) | 992.0  | 992.0<br>(298, 1,150) | 1,359.5<br>(-258.0, 4,972.0) | -377.0<br>(-993.0, 239.0) | 310.0<br>(-441.8, 2,996.4) | 381<br>(-9.5, 1,743.9)   |
| Duration of moderate to vigorous physical activity (minutes/day) | No. of study arms | 2                     | 1      | 3                     | 9                            | 4                         | 13                         | 16                       |
|                                                                  | Median change     | 27.6<br>(-2.4, 30.0)  | -70.6  | -2.4<br>(-70.6, 30.0) | 1.2<br>(-4.5, 20.2)          | 5.1<br>(-2.5, 15.4)       | 4.4<br>(-3.0, 14.7)        | 2.3<br>(-4.2, 16.7)      |
| <b>Diet</b>                                                      |                   |                       |        |                       |                              |                           |                            |                          |
| Total energy intake (kilocalories/day)                           | No. of study arms | 1                     | NR     | NR                    | 5                            | NR                        | NR                         | 6                        |
|                                                                  | Median change     | -75                   |        |                       | -117.9<br>(-373.1, 28.5)     |                           |                            | -121.0<br>(-268.0, 0.59) |
| Snack intake (kilocalories/day)                                  | No. of study arms | 1                     | 1      | 2                     | 1                            | NR                        | NR                         | 3                        |
|                                                                  | Median change     | -233.7                | -123.7 | -178.7                | -281.9                       |                           |                            | -233.7                   |
| Sugar sweetened beverage intake (relative percent change)        | No. of study arms | NR                    | NR     | NR                    | 8                            | 6                         | 14                         | NA                       |
|                                                                  | Median change     |                       |        |                       | -17.2<br>(-54.7, -9.2)       | -1.6<br>(-40.9, 5.4)      | -10.9<br>(-50.0, 3.5)      |                          |



**Appendix**  
**Reducing Recreational Sedentary Screen Time: A Community Guide Systematic Review**  
**Ramsey Buchanan et al.**

|                                           |                   |                         |       |                         |                        |                         |                        |                         |
|-------------------------------------------|-------------------|-------------------------|-------|-------------------------|------------------------|-------------------------|------------------------|-------------------------|
| Fruit and vegetable intake (servings/day) | No. of study arms | NR                      | NR    | NR                      | 9                      | 5                       | 14                     | NA                      |
|                                           | Median change     |                         |       |                         | 0.16<br>(-0.25, 0.43)  | 0.5<br>(-0.85, 1.04)    | 0.21<br>(-0.38, 0.53)  |                         |
| <b>Weight-related outcomes</b>            |                   |                         |       |                         |                        |                         |                        |                         |
| BMI (kg/m <sup>2</sup> )                  | No. of study arms | 3                       | 1     | 4                       | 9                      | 2                       | 11                     | 15                      |
|                                           | Median change     | -0.44<br>(-0.45, -0.04) | -0.09 | -0.27<br>(-0.45, -0.04) | -0.21<br>(-0.65, 0.07) | 0.13<br>(0.10, 0.16)    | -0.08<br>(-0.40, 0.10) | -0.09<br>(-0.44, -0.04) |
| BMI z-score                               | No. of study arms | 1                       | 1     | 2                       | 7                      | 5                       | 12                     | 14                      |
|                                           | Median change     | -0.20                   | 0.01  | -0.11                   | -0.11<br>(-0.19, 0.02) | -0.20<br>(-0.34, -0.02) | -0.11<br>(-0.19, 0.05) | -0.13<br>(-0.23, -0.01) |
| Percent body fat (pct pts)                | No. of study arms | 1                       | NR    | NR                      | 5                      | 2                       | 7                      | 8                       |
|                                           | Median change     | -2.54                   |       |                         | -4.9<br>(-5.9, 2.8)    | -0.38<br>(-0.83, 0.08)  | -4.5<br>(-5.5, -0.8)   | -3.5<br>(-5.4, -0.90)   |
| <b>Morbidity</b>                          |                   |                         |       |                         |                        |                         |                        |                         |
| Obesity prevalence (pct pts)              | No. of study arms | NR                      | NR    | NR                      | 9                      | 4                       | 13                     | NA                      |
|                                           | Median change     |                         |       |                         | -2.0<br>(-2.8, -1.1)   | -4.6<br>(-7.6, -1.1)    | -2.3<br>(-4.5, -1.2)   |                         |

*Note:* All medians are followed by interquartile interval if there are  $\geq 5$  study arms, range if there are  $< 5$  study arms. Not all studies are represented in the table because of inconsistent outcome measures.

<sup>a</sup> Screen-time-only interventions only focus on reducing recreational sedentary screen time.

**Appendix**  
**Reducing Recreational Sedentary Screen Time: A Community Guide Systematic Review**  
**Ramsey Buchanan et al.**

<sup>b</sup> Screen-time-plus interventions focus on reducing recreational sedentary screen time and increasing physical activity and/or improving diet.

<sup>c</sup> High-intensity interventions must include use of an electronic monitoring device to limit screen time or at least three personal or computer-tailored interactions.

<sup>d</sup> Low-intensity interventions include two or fewer personal or computer-tailored interactions.

<sup>e</sup> Contingent = Screen time contingent on physical activity.

kg, kilogram; m, meter; NA, not applicable; NR, not reported; pct pts, percentage points

## References

1. Ogden CL, Carroll MD, Kit BK, Flegal KM. Prevalence of childhood and adult obesity in the United States, 2011-2012. *JAMA*. 2014;311(8):806-814.  
<http://dx.doi.org/10.1001/jama.2014.732>.
2. Freedman DS, Mei Z, Srinivasan SR, Berenson GS, Dietz WH. Cardiovascular risk factors and excess adiposity among overweight children and adolescents: the Bogalusa Heart Study. *J Pediatr*. 2007;150(1):12-17. <http://dx.doi.org/10.1016/j.jpeds.2006.08.042>.
3. Rosenbloom AL, Joe JR, Young RS, Winter WE. Emerging epidemic of type 2 diabetes in youth. *Diabetes Care*. 1999;22(2):345-354. <http://dx.doi.org/10.2337/diacare.22.2.345>.
4. Biro FM, Wien M. Childhood obesity and adult morbidities. *Am J Clin Nutr*. 2010;91(5):1499s-1505s. <http://dx.doi.org/10.3945/ajcn.2010.28701B>.
5. Serdula MK, Ivery D, Coates RJ, Freedman DS, Williamson DF, Byers T. Do obese children become obese adults? A review of the literature. *Prev Med*. 1993;22(2):167-177.  
<http://dx.doi.org/10.1006/pmed.1993.1014>.
6. Whitlock G, Lewington S, Sherliker P, et al. Body-mass index and cause-specific mortality in 900 000 adults: collaborative analyses of 57 prospective studies. *Lancet*. 2009;373(9669):1083-1096. [http://dx.doi.org/10.1016/S0140-6736\(09\)60318-4](http://dx.doi.org/10.1016/S0140-6736(09)60318-4).
7. NIH. Clinical guidelines on the identification, evaluation, and treatment of overweight and obesity in adults: the evidence report. Vol No. 98-4083. Bethesda, MD;1998.
8. U.S. DHHS, Office of Disease Prevention and Health Promotion. Healthy People 2020.  
[www.healthypeople.gov/2020/default](http://www.healthypeople.gov/2020/default). Accessed April 30, 2014.

**Appendix**  
**Reducing Recreational Sedentary Screen Time: A Community Guide Systematic Review**  
**Ramsey Buchanan et al.**

9. Tremblay MS, LeBlanc AG, Kho ME, et al. Systematic review of sedentary behaviour and health indicators in school-aged children and youth. *Int J Behav Nutr Phys Act*. 2011;8:98. <http://dx.doi.org/10.1186/1479-5868-8-98>.
10. Kimbro RT, Brooks-Gunn J, McLanahan S. Young children in urban areas: Links among neighborhood characteristics, weight status, outdoor play, and television watching. *Soc Sci Med*. 2011;72(5):668-676. <http://dx.doi.org/10.1016/j.socscimed.2010.12.015>.
11. Marshall S, Biddle S, Gorely T, Cameron N, Murdey I. Relationships between media use, body fatness and physical activity in children and youth: a meta-analysis. *Int J Obes*. 2004;28:1238-1246. <http://dx.doi.org/10.1038/sj.ijo.0802706>.
12. Hancox R, Milne B, Poulton R. Association between child and adolescent television viewing and adult health: a longitudinal birth cohort study. *Lancet*. 2004;364:257-262. [http://dx.doi.org/10.1016/S0140-6736\(04\)16675-0](http://dx.doi.org/10.1016/S0140-6736(04)16675-0).
13. Shuval K, Gabriel KP, Leonard T. TV viewing and BMI by race/ethnicity and socioeconomic status. *PLoS One*. 2013;8(5):e63579. <http://dx.doi.org/10.1371/journal.pone.0063579>.
14. Thorp AA, Owen N, Neuhaus M, Dunstan DW. Sedentary behaviors and subsequent health outcomes in adults: a systematic review of longitudinal studies, 1996-2011. *Am J Prev Med*. 2011;41(2):207-215. <http://dx.doi.org/10.1016/j.amepre.2011.05.004>.
15. Grontved A, Hu FB. Television viewing and risk of type 2 diabetes, cardiovascular disease, and all-cause mortality: a meta-analysis. *JAMA*. 2011;305(23):2448-2455. <http://dx.doi.org/10.1001/jama.2011.812>.

**Appendix**  
**Reducing Recreational Sedentary Screen Time: A Community Guide Systematic Review**  
**Ramsey Buchanan et al.**

16. McKetta S, Rich M. The fault, dear viewer, lies not in the screens, but in ourselves: relationships between screen media and childhood overweight/obesity. *Pediatr Clin North Am.* 2011;58(6):1493-1508, xii. <http://dx.doi.org/10.1016/j.pcl.2011.09.010>.
17. American Academy of Pediatrics. American Academy of Pediatrics. Children, adolescents, and television. *Pediatrics.* 2001;107(2):423-426. <http://dx.doi.org/10.1542/peds.107.2.423>.
18. Rideout V, Foehr U, Roberts D. *GENERATION M<sup>2</sup>: Media in the lives of 8- to 18-year-olds*. Menlo Park, CA: The Henry J. Kaiser Family Foundation; 2010.
19. U.S. Department of Labor. American time use survey summary. 2014. [www.bls.gov/news.release/atus.nr0.htm](http://www.bls.gov/news.release/atus.nr0.htm).
20. Guide to Community Preventive Services. Obesity prevention and control. 2015; [www.thecommunityguide.org/obesity/index.html](http://www.thecommunityguide.org/obesity/index.html).
21. Guide to Community Preventive Services. Obesity prevention and control: behavioral interventions to reduce screen time. 2008; [www.thecommunityguide.org/obesity/communitysettings\\_archive.html](http://www.thecommunityguide.org/obesity/communitysettings_archive.html).
22. Briss PA, Zaza S, Pappaioanou M, et al. Developing an evidence-based Guide to Community Preventive Services—methods. The Task Force on Community Preventive Services. *Am J Prev Med.* 2000;18(1 Suppl):35-43. [http://dx.doi.org/10.1016/S0749-3797\(99\)00119-1](http://dx.doi.org/10.1016/S0749-3797(99)00119-1).
23. Zaza S, Wright-De Agüero LK, Briss PA, et al. Data collection instrument and procedure for systematic reviews in the guide to community preventive services. *Am J Prev Med.* 2000;18(1 Suppl):44-74. [http://dx.doi.org/10.1016/S0749-3797\(99\)00122-1](http://dx.doi.org/10.1016/S0749-3797(99)00122-1).

**Appendix**  
**Reducing Recreational Sedentary Screen Time: A Community Guide Systematic Review**  
**Ramsey Buchanan et al.**

24. The World Bank. Country and lending groups. 2014; [data.worldbank.org/about/country-and-lending-groups](http://data.worldbank.org/about/country-and-lending-groups).
25. Bailey BW, McInnis K. Energy cost of exergaming: a comparison of the energy cost of 6 forms of exergaming. *Arch Pediatr Adolesc Med*. 2011;165(7):597-602.  
<http://dx.doi.org/10.1001/archpediatrics.2011.15>.
26. Cole TJ, Bellizzi MC, Flegal KM, Dietz WH. Establishing a standard definition for child overweight and obesity worldwide: international survey. *BMJ*. 2000;320(7244):1240-1243. <http://dx.doi.org/10.1136/bmj.320.7244.1240>.
27. Kuczmarski RJ, Ogden CL, Guo SS, et al. 2000 CDC growth charts for the United States: methods and development. National Center for Health Statistics. *Vital Health Stat*. 2002;11(246).
28. Rolland-Cachera MF, Cole TJ, Sempe M, Tichet J, Rossignol C, Charraud A. Body mass index variations: centiles from birth to 87 years. *Eur J Clin Nutr*. 1991;45(1):13-21.
29. Eichler H-G, Kong SX, Gerth WC, Mavros P, Jönsson B. Use of cost-effectiveness analysis in health-care resource allocation decision-making: How are cost-effectiveness thresholds expected to emerge? *Value Health*. 2004;7(5):518-528.  
<http://dx.doi.org/10.1111/j.1524-4733.2004.75003.x>.
30. Kameswararao AA, Bachu A. Survey of childhood diabetes and impact of school level educational interventions in rural schools in Karimnagar district. *Int J Diabetes Dev Ctries*. 2009;29(2):69-73. <http://dx.doi.org/10.4103/0973-3930.53123>.
31. Corriveau NL, Gurm R, Smith CA, et al. Middle school wellness program shows lasting impact for lower income community: a report from project healthy schools. *Circulation*. 2012;Abstract 18634.

**Appendix**  
**Reducing Recreational Sedentary Screen Time: A Community Guide Systematic Review**  
**Ramsey Buchanan et al.**

32. Pelletier JA. Use of stimulus management techniques to reduce sedentary behaviors of overweight children. *All Graduate Theses and Dissertations*. Paper 58.  
[digitalcommons.usu.edu/etd/58](http://digitalcommons.usu.edu/etd/58). Accessed August 27, 2015.
33. Stahl CE, Necheles JW, Mayefsky JH, Wright LK, Rankin KM. 5-4-3-2-1 go! Coordinating pediatric resident education and community health promotion to address the obesity epidemic in children and youth. *Clin Pediatr (Phila)*. 2011;50(3):215-224.  
<http://dx.doi.org/10.1177/0009922810385106>.
34. Ribeiro RQDC. Effectiveness evaluation of a school program for obesity prevention. Oral Presentations from the World Congress of Cardiology Scientific Sessions; 2012 April 18-21; Dubai, United Arab Emirates. *Circulation*. 2012;125(19):e72.
35. Birken CS, Maguire J, Mekky M, et al. Office-based randomized controlled trial to reduce screen time in preschool children. *Pediatrics*. 2012;130(6):1110-1115.  
<http://dx.doi.org/10.1542/peds.2011-3088>.
36. Epstein LH, Roemmich JN, Robinson JL, et al. A randomized trial of the effects of reducing television viewing and computer use on body mass index in young children. *Arch Pediatr Adolesc Med*. 2008;162(3):239-245.  
<http://dx.doi.org/10.1001/archpediatrics.2007.45>.
37. Escobar-Chaves SL, Markham CM, Addy RC, Greisinger A, Murray NG, Brehm B. The Fun Families Study: intervention to reduce children's TV viewing. *Obesity (Silver Spring)*. 2010;18(Suppl 1):S99-S101. <http://dx.doi.org/10.1038/oby.2009.438>.
38. Ford BS, McDonald TE, Owens AS, Robinson TN. Primary care interventions to reduce television viewing in African-American children. *Am J Prev Med*. 2002;22(2):106-109.  
[http://dx.doi.org/10.1016/S0749-3797\(01\)00410-X](http://dx.doi.org/10.1016/S0749-3797(01)00410-X).

**Appendix**  
**Reducing Recreational Sedentary Screen Time: A Community Guide Systematic Review**  
**Ramsey Buchanan et al.**

39. Gorin A, Raynor H, Chula-Maguire K, Wing R. Decreasing household television time: a pilot study of a combined behavioral and environmental intervention. *Behav Intervent*. 2006;21(4):273-280. <http://dx.doi.org/10.1002/bin.221>.
40. Johnson DB, Birkett D, Evens C, Pickering S. Statewide intervention to reduce television viewing in WIC clients and staff. *Am J Health Promot*. 2005;19(6):418-421. <http://dx.doi.org/10.4278/0890-1171-19.6.418>.
41. Ni Mhurchu C, Roberts V, Maddison R, et al. Effect of electronic time monitors on children's television watching: pilot trial of a home-based intervention. *Prev Med*. 2009;49(5):413-417. <http://dx.doi.org/10.1016/j.ypmed.2009.09.003>.
42. Robinson TN. Reducing children's television viewing to prevent obesity: a randomized controlled trial. *JAMA*. 1999;282(16):1561-1567. <http://dx.doi.org/10.1001/jama.282.16.1561>.
43. Robinson TN, Borzekowski DL. Effects of the SMART classroom curriculum to reduce child and family screen time. *J Commun*. 2006;56(1):1-26. <http://dx.doi.org/10.1111/j.1460-2466.2006.00001.x>.
44. Todd MK, Reis-Bergan MJ, Sidman CL, et al. Effect of a family-based intervention on electronic media use and body composition among boys aged 8--11 years: a pilot study. *J Child Health Care*. 2008;12(4):344-358. <http://dx.doi.org/10.1177/1367493508097404>.
45. Zimmerman FJ, Ortiz SE, Christakis DA, Elkun D. The value of social-cognitive theory to reducing preschool TV viewing: a pilot randomized trial. *Prev Med*. 2012;54(3-4):212-218. <http://dx.doi.org/10.1016/j.ypmed.2012.02.004>.
46. Otten JJ, Jones KE, Littenberg B, Harvey-Berino J. Effects of television viewing reduction on energy intake and expenditure in overweight and obese adults: a randomized



- controlled trial. *Arch Intern Med.* 2009;169(22):2109-2115.  
<http://dx.doi.org/10.1001/archinternmed.2009.430>.
47. Branscum PW. Designing and evaluating an after-school social cognitive theory based comic book intervention for the prevention of childhood obesity among elementary aged school children. *DAI-A.* 2012;73(1-A):87.
48. Campbell KJ, Lioret S, McNaughton SA, et al. A parent-focused intervention to reduce infant obesity risk behaviors: a randomized trial. *Pediatrics.* 2013;131(4):652-660.  
<http://dx.doi.org/10.1542/peds.2012-2576>.
49. Davison KK, Jurkowski JM, Li K, Kranz S, Lawson HA. A childhood obesity intervention developed by families for families: results from a pilot study. *Int J Behav Nutr Phys Act.* 2013;10(3). <http://dx.doi.org/10.1186/1479-5868-10-3>.
50. de Silva-Sanigorski AM, Bell AC, Kremer P, et al. Reducing obesity in early childhood: results from Romp & Chomp, an Australian community-wide intervention program. *Am J Clin Nutr.* 2010;91(4):831-840. <http://dx.doi.org/10.3945/ajcn.2009.28826>.
51. Dennison BA, Russo TJ, Burdick PA, Jenkins PL. An intervention to reduce television viewing by preschool children. *Arch Pediatr Adolesc Med.* 2004;158(2):170-176.  
<http://dx.doi.org/10.1001/archpedi.158.2.170>.
52. Epstein LH, Paluch RA, Gordy CC, Dorn J. Decreasing sedentary behaviors in treating pediatric obesity. *Arch Pediatr Adolesc Med.* 2000;154(3):220-226.  
<http://dx.doi.org/10.1001/archpedi.154.3.220>.
53. Epstein LH, Valoski AM, Vara LS, et al. Effects of decreasing sedentary behavior and increasing activity on weight change in obese children. *Health Psychology.* 1995;14(2):109-115. <http://dx.doi.org/10.1037/0278-6133.14.2.109>.

**Appendix**  
**Reducing Recreational Sedentary Screen Time: A Community Guide Systematic Review**  
**Ramsey Buchanan et al.**

54. Ezendam NP, Brug J, Oenema A. Evaluation of the web-based computer-tailored FATaintPHAT intervention to promote energy balance among adolescents: results from a school cluster randomized trial. *Arch Pediatr Adolesc Med.* 2012;166(3):248-255. <http://dx.doi.org/10.1001/archpediatrics.2011.204>.
55. French SA, Gerlach AF, Mitchell NR, Hannan PJ, Welsh EM. Household obesity prevention: Take Action-a group-randomized trial. *Obesity (Silver Spring).* 2011;19(10):2082-2088. <http://dx.doi.org/10.1038/oby.2010.328>.
56. Gentile DA, Welk G, Eisenmann JC, et al. Evaluation of a multiple ecological level child obesity prevention program: Switch what you Do, View, and Chew. *BMC Med.* 2009;7:49. <http://dx.doi.org/10.1186/1741-7015-7-49>.
57. Goldfield GS, Mallory R, Parker T, et al. Effects of open-loop feedback on physical activity and television viewing in overweight and obese children: a randomized, controlled trial. *Pediatrics.* 2006(1):e157-e166. <http://dx.doi.org/10.1542/peds.2005-3052>.
58. Gortmaker SL, Cheung LWY, Peterson KE, et al. Impact of a school-based interdisciplinary intervention on diet and physical activity among urban primary school children: eat well and keep moving. *Arch Pediatr Adolesc Med.* 1999;153(9):975-983. <http://dx.doi.org/10.1001/archpedi.153.9.975>.
59. Gortmaker SL, Peterson K, Wiecha J, et al. Reducing obesity via a school-based interdisciplinary intervention among youth: Planet Health. *Arch Pediatr Adolesc Med.* 1999(4):409-418. <http://dx.doi.org/10.1001/archpedi.153.4.409>.

**Appendix**  
**Reducing Recreational Sedentary Screen Time: A Community Guide Systematic Review**  
**Ramsey Buchanan et al.**

60. Hardy LL, King L, Kelly B, Farrell L, Howlett S. Munch and Move: evaluation of a preschool healthy eating and movement skill program. *Int J Behav Nutr Phys Act*. 2010;7:80. <http://dx.doi.org/10.1186/1479-5868-7-80>.
61. Harrison M, Burns CF, McGuinness M, Heslin J, Murphy NM. Influence of a health education intervention on physical activity and screen time in primary school children: Switch Off–Get Active. *J Sci Med Sport*. 2006;9(5):388-394. <http://dx.doi.org/10.1016/j.jsams.2006.06.012>.
62. Jago R, Sebire SJ, Turner KM, et al. Feasibility trial evaluation of a physical activity and screen-viewing course for parents of 6 to 8 year-old children: Teamplay. *Int J Behav Nutr Phys Act*. 2013;10:31. <http://dx.doi.org/10.1186/1479-5868-10-31>.
63. Johnson B, Kremer P, Swinburn B, de Silva-Sanigorski A. Multilevel analysis of the Be Active Eat Well intervention: environmental and behavioural influences on reductions in child obesity risk. *Int J Obes*. 2012;36(7):901-907. <http://dx.doi.org/10.1038/ijo.2012.23>.
64. Jouret B, Ahluwalia N, Dupuy M, et al. Prevention of overweight in preschool children: results of kindergarten-based interventions. *Int J Obes (Lond)*. 2009;33(10):1075-1083. <http://dx.doi.org/10.1038/ijo.2009.166>.
65. Lloyd JJ, Wyatt KM, Creanor S. Behavioural and weight status outcomes from an exploratory trial of the Healthy Lifestyles Programme (HeLP): a novel school-based obesity prevention programme. *BMJ Open*. 2012;2(3). <http://dx.doi.org/10.1136/bmjopen-2011-000390>.
66. Marcus C, Nyberg G, Nordenfelt A, Karpmyr M, Kowalski J, Ekelund U. A 4-year, cluster-randomized, controlled childhood obesity prevention study: STOPP. *Int J Obes (Lond)*. 2009;33(4):408-417. <http://dx.doi.org/10.1038/ijo.2009.38>.

**Appendix**  
**Reducing Recreational Sedentary Screen Time: A Community Guide Systematic Review**  
**Ramsey Buchanan et al.**

67. O'Connor T, Hilmers A, Watson K, Baranowski T, Giardino A. Feasibility of an obesity intervention for paediatric primary care targeting parenting and children: Helping HAND. *Child Care Health Dev.* 2013;39(1):141-149. <http://dx.doi.org/10.1111/j.1365-2214.2011.01344.x>.
68. Patrick K, Calfas KJ, Norman GJ, et al. Randomized controlled trial of a primary care and home-based intervention for physical activity and nutrition behaviors: PACE+ for adolescents. *Arch Pediatr Adolesc Med.* 2006;160(2):128-136. <http://dx.doi.org/10.1001/archpedi.160.2.128>.
69. Puder JJ, Marques-Vidal P, Schindler C, et al. Effect of multidimensional lifestyle intervention on fitness and adiposity in predominantly migrant preschool children (Ballabeina): cluster randomised controlled trial. *BMJ.* 2011;343:d6195. <http://dx.doi.org/10.1136/bmj.d6195>.
70. Riggs NR, Sakuma KL, Pentz MA. Preventing risk for obesity by promoting self-regulation and decision-making skills: pilot results from the PATHWAYS to health program (PATHWAYS). *Eval Rev.* 2007;31(3):287-310. <http://dx.doi.org/10.1177/0193841X06297243>.
71. Robinson T, Killen J, Kraemer H, Wilson D, Matheson D, Haskell W. Dance and reducing TV to prevent weight gain in African-American girls: the Stanford GEMS pilot study. *Ethn Dis.* 2003;13:S65-S77.
72. Robinson TN, Matheson DM, Kraemer HC, et al. A randomized controlled trial of culturally tailored dance and reducing screen time to prevent weight gain in low-income African American girls: Stanford GEMS. *Arch Pediatr Adolesc Med.* 2010(11):995-1004. <http://dx.doi.org/10.1001/archpediatrics.2010.197>.

**Appendix**  
**Reducing Recreational Sedentary Screen Time: A Community Guide Systematic Review**  
**Ramsey Buchanan et al.**

73. Roemmich JN, Gurgol CM, Epstein LH. Open-loop feedback increases physical activity of youth. *Med Sci Sports Exerc.* 2004(4):668-673.  
<http://dx.doi.org/10.1249/01.MSS.0000121947.59529.3B>.
74. Roemmich JN, Lobarinas CL, Barkley JE, White TM, Paluch R, Epstein LH. Use of an open-loop system to increase physical activity. *Pediatr Exerc Sci.* 2012;24(3):384-398.
75. Salmon J, Ball K, Hume C, Booth M, Crawford D. Outcomes of a group-randomized trial to prevent excess weight gain, reduce screen behaviours and promote physical activity in 10-year-old children: Switch-play. *Int J Obes.* 2008;32(4):601-612.  
<http://dx.doi.org/10.1038/sj.ijo.0803805>.
76. Salmon J, Jorna M, Hume C, et al. A translational research intervention to reduce screen behaviours and promote physical activity among children: Switch-2-Activity. *Health Promot Int.* 2011;26(3):311-321. <http://dx.doi.org/10.1093/heapro/daq078>.
77. Shapiro JR, Bauer S, Hamer RM, Kordy H, Ward D, Bulik CM. Use of text messaging for monitoring sugar-sweetened beverages, physical activity, and screen time in children: a pilot study. *J Nutr Educ Behav.* 2008;40(6):385-391.  
<http://dx.doi.org/10.1016/j.jneb.2007.09.014>.
78. Spruijt-Metz D, Nguyen-Michel ST, Goran MI, Chou CP, Huang TT. Reducing sedentary behavior in minority girls via a theory-based, tailored classroom media intervention. *Int J Pediatr Obes.* 2008;3(4):240-248. <http://dx.doi.org/10.1080/17477160802113415>.
79. Taveras EM, Gortmaker SL, Hohman KH, et al. Randomized controlled trial to improve primary care to prevent and manage childhood obesity: the High Five for Kids study. *Arch Pediatr Adolesc Med.* 2011;165(8):714-722.  
<http://dx.doi.org/10.1001/archpediatrics.2011.44>.

**Appendix**  
**Reducing Recreational Sedentary Screen Time: A Community Guide Systematic Review**  
**Ramsey Buchanan et al.**

80. Tucker S, Lanningham-Foster L, Murphy J, et al. A school based community partnership for promoting healthy habits for life. *J Community Health*. 2011;36(3):414-422.  
<http://dx.doi.org/10.1007/s10900-010-9323-9>.
81. Warren JM, Henry CJ, Lightowler HJ, Bradshaw SM, Perwaiz S. Evaluation of a pilot school programme aimed at the prevention of obesity in children. *Health Promot Int*. 2003;18(4):287-296. <http://dx.doi.org/10.1093/heapro/dag402>.
82. Whaley SE, McGregor S, Jiang L, Gomez J, Harrison G, Jenks E. A WIC-based intervention to prevent early childhood overweight. *J Nutr Educ Behav*. 2010;42(3 Suppl):S47-S51. <http://dx.doi.org/10.1016/j.jneb.2010.02.010>.
83. Spring B, Schneider K, McFadden HG, et al. Multiple behavior changes in diet and activity: a randomized controlled trial using mobile technology. *Arch Intern Med*. 2012;172(10):789-796. <http://dx.doi.org/10.1001/archinternmed.2012.1044>.
84. Wang LY, Yang Q, Lowry R, Wechsler H. Economic analysis of a school-based obesity prevention program. *Obes Res*. 2003;11(11):1313-1324.  
<http://dx.doi.org/10.1038/oby.2003.178>.
85. Dalziel K, Segal L, Mortimer D. *Risk factor study - How to reduce the burden of harm from poor nutrition, tobacco smoking, physical inactivity and alcohol misuse: cost-utility analysis of 9 multi-risk factor interventions*. Melbourne, Australia: Monash University, Centre for Health Economics; 2005.
86. Madden M, Lenhart A, Duggan M, Cortesi S, Gasser U. *Teens and Technology 2013*. Cambridge, MA: Pew Research Center, The Berkman Center for Internet & Society at Harvard University; 2013.

**Appendix**  
**Reducing Recreational Sedentary Screen Time: A Community Guide Systematic Review**  
**Ramsey Buchanan et al.**

87. Schwantes T. Using active living principles to promote physical activity in rural communities. 2010. [activelivingresearch.org/using-active-living-principles-promote-physical-activity-rural-communities](http://activelivingresearch.org/using-active-living-principles-promote-physical-activity-rural-communities). Accessed August 27, 2015.
88. Falbe J, Davison KK, Franckle RL, et al. Sleep duration, restfulness, and screens in the sleep environment. *Pediatrics*. 2015;135(2):e367-75.  
<http://dx.doi.org/10.1542/peds.2014-2306>.
89. Richards R, McGee R, Williams SM, Welch D, Hancox RJ. Adolescent screen time and attachment to parents and peers. *Arch Pediatr Adolesc Med*. 2010;164(3):258-262.  
<http://dx.doi.org/10.1001/archpediatrics.2009.280>.
90. Biddle SJH, Petrolini I, Pearson N. Interventions designed to reduce sedentary behaviours in young people: a review of reviews. *Br J Sports Med*. 2014;48:182-186.  
<http://dx.doi.org/10.1136/bjsports-2013-093078>.
